# Supplementary material
Source: PubMed Central journal article supplement (PMC2952247)
Supplement: supp_M110.157230_Article_3523_corrected_supplemental_figures.pdf [file supp_M110.157230_Article_3523_corrected_supplemental_figures.pdf]

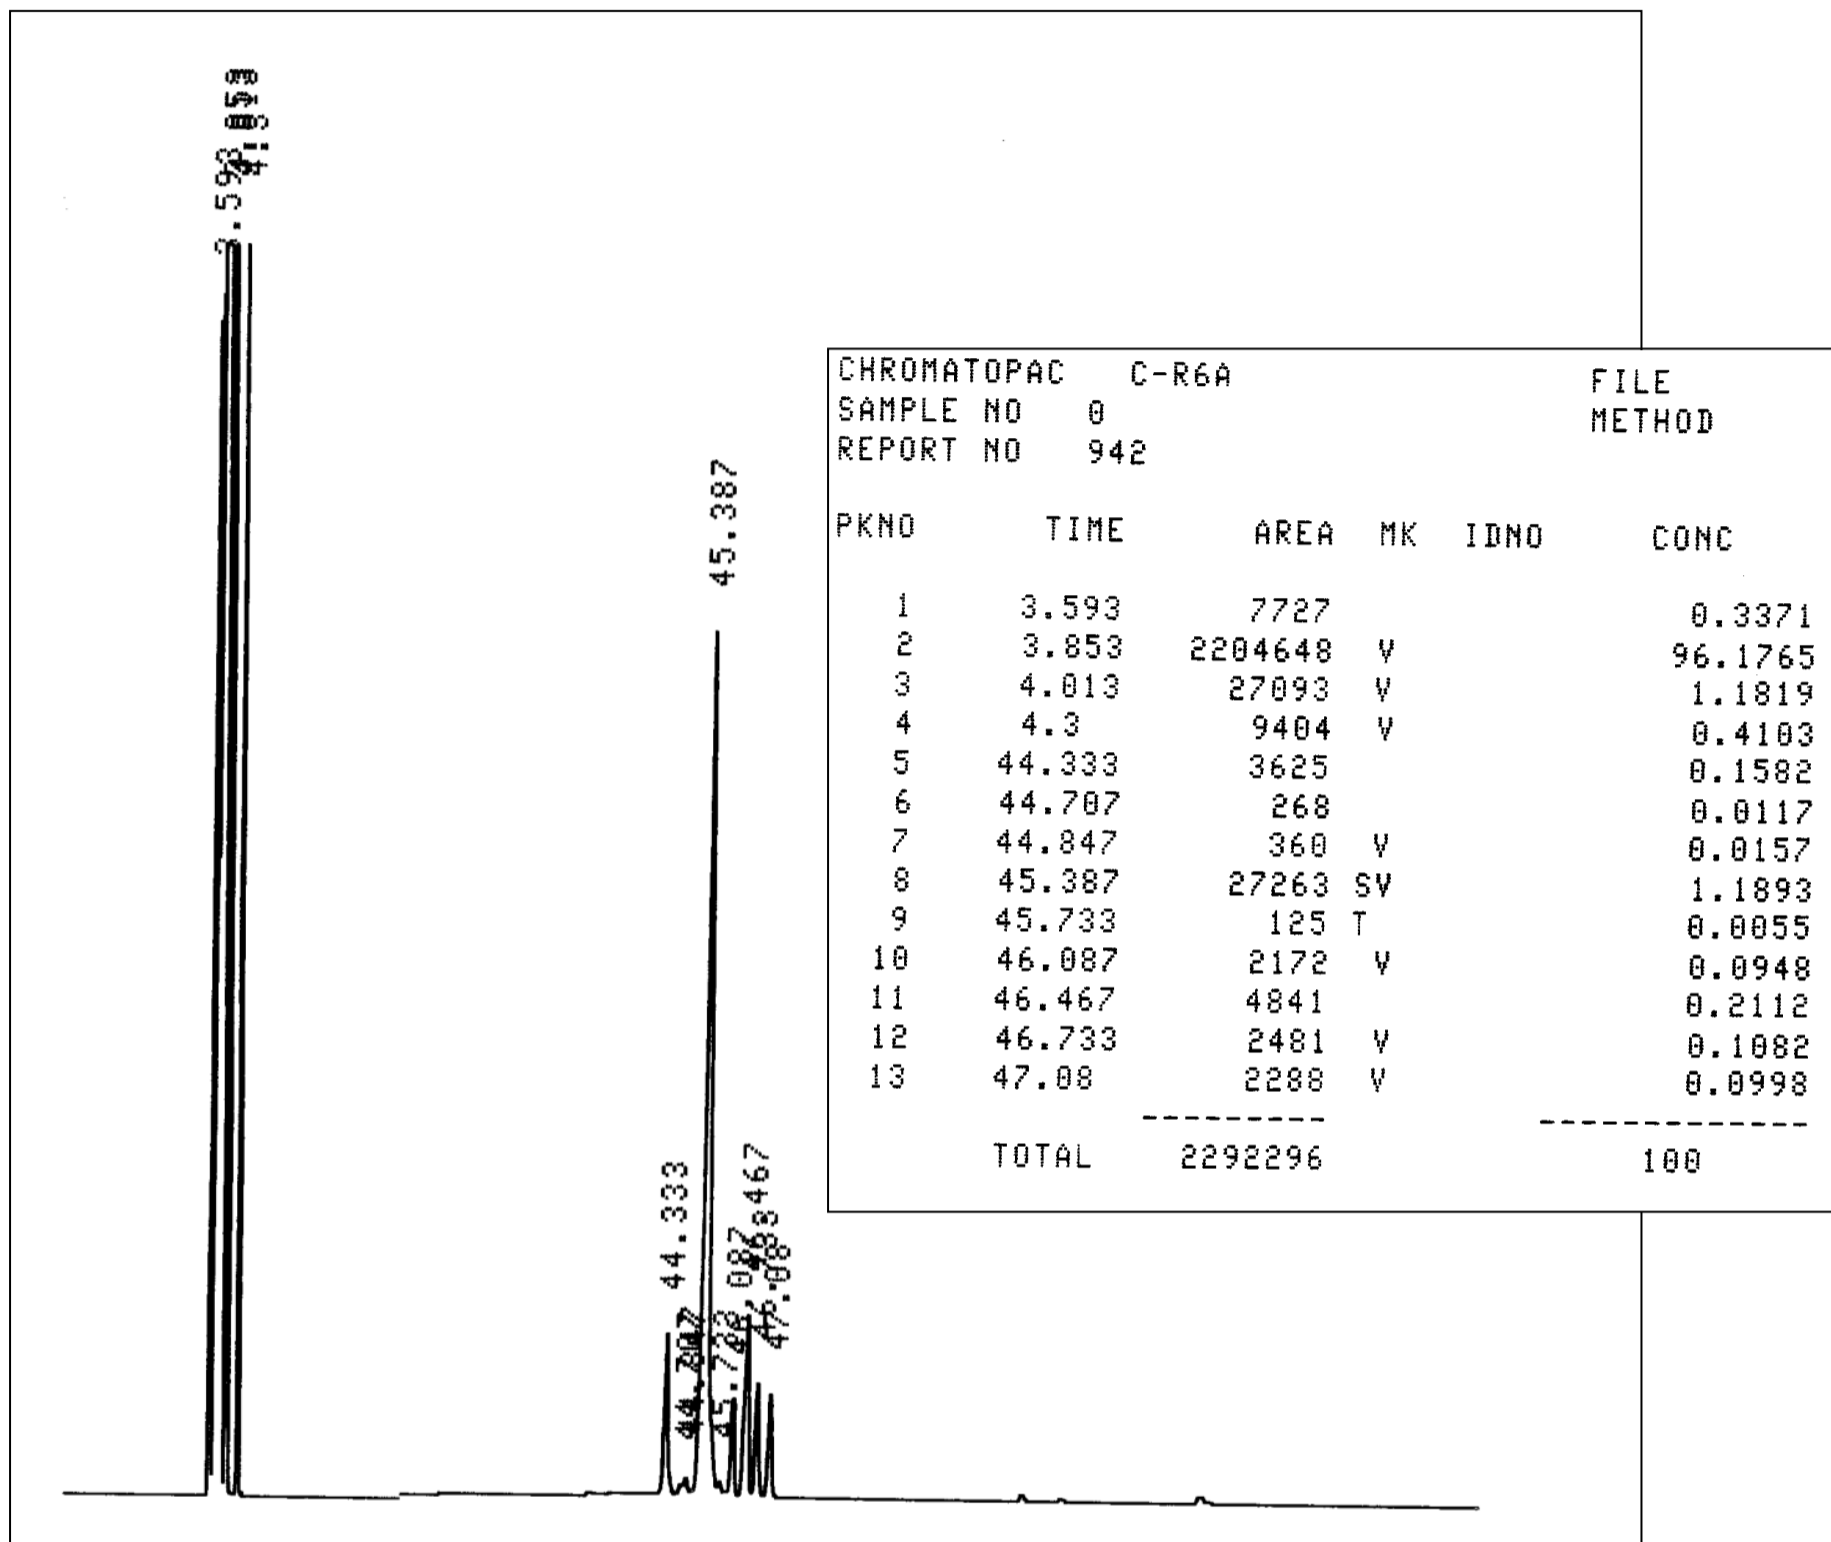

Supplemental Figure S1. **Gas chromatography of botryococcene total hydrocarbon fraction.** Peaks occurring between approximately 44 and 48 minutes (peaks number 5-13) correspond to the 9 compounds, at a minimum, found within the total hydrocarbon fraction. The largest peaks represent the botryococcenes isolated for this study. Peak number 8 is C<sub>34</sub> botryococcene. Peaks between 3.5 and 4.3 minutes (peaks number 1-4) are solvent peaks.

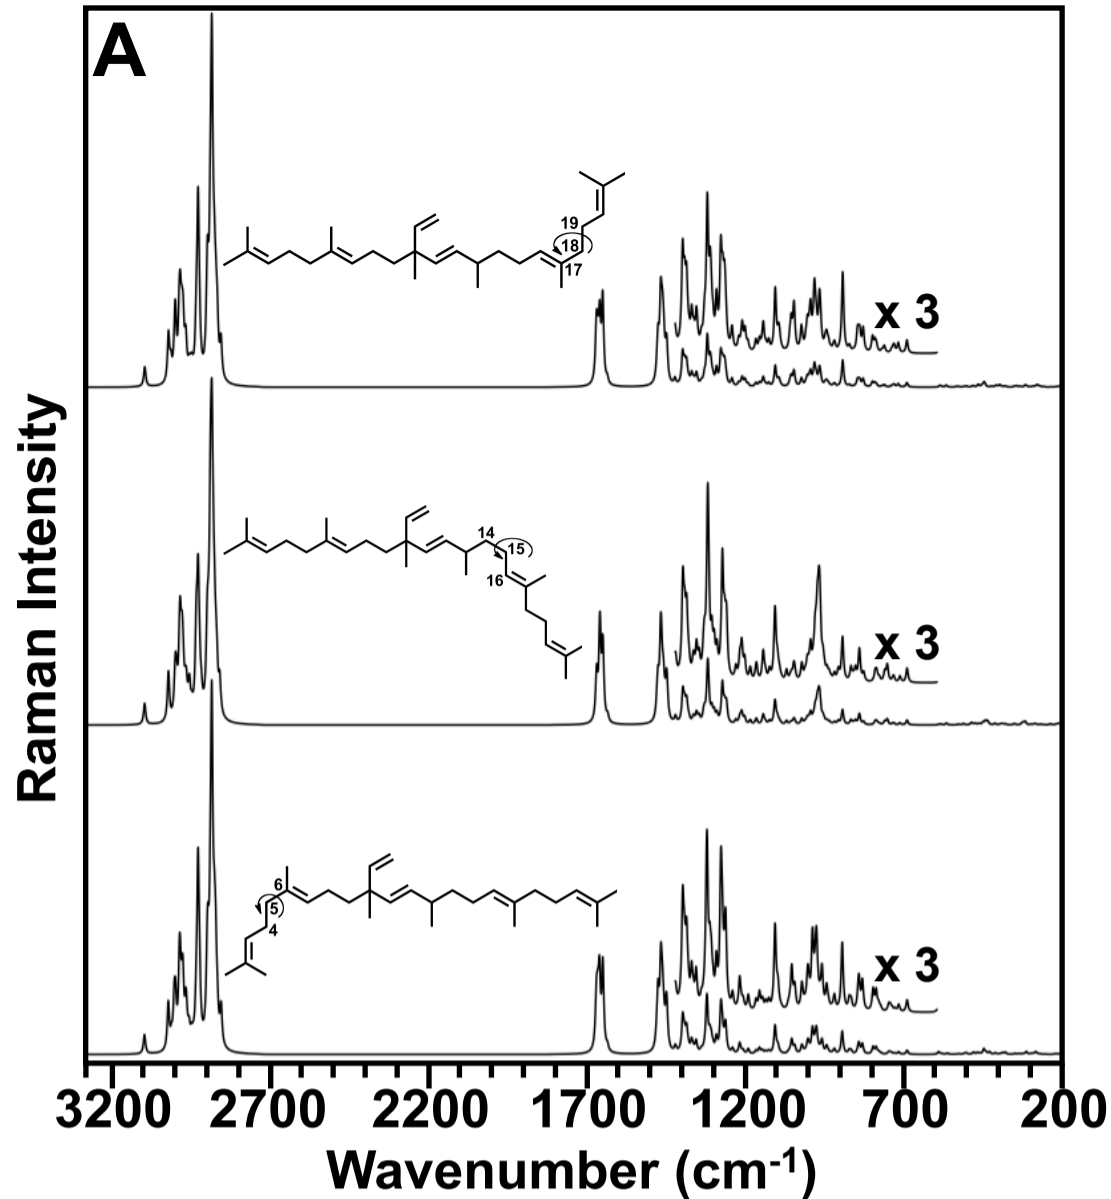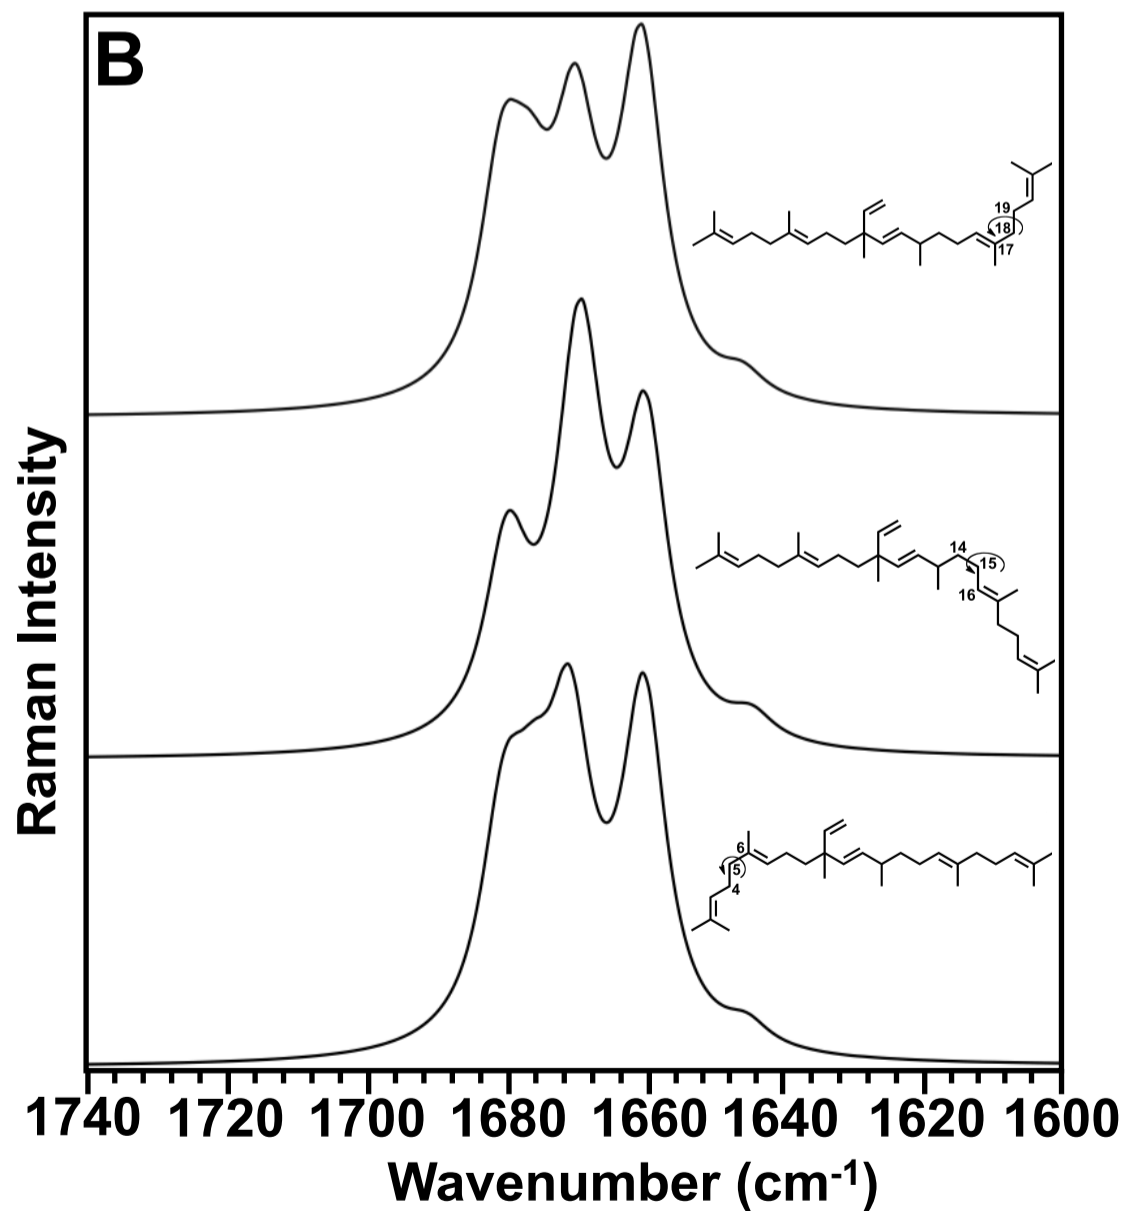

Supplemental Figure S2. **Raman spectra for three  $\text{C}_{30}$  botryococcene conformers.** *A*, Raman spectra of  $\text{C}_{30}$  botryococcene conformers in the 200 - 3300  $\text{cm}^{-1}$  range. *B*, Raman spectra of  $\text{C}_{30}$  botryococcene conformers in the 1600 - 1740  $\text{cm}^{-1}$   $\nu(\text{C}=\text{C})$  stretching region. Arrows indicate rotation around indicated carbon.

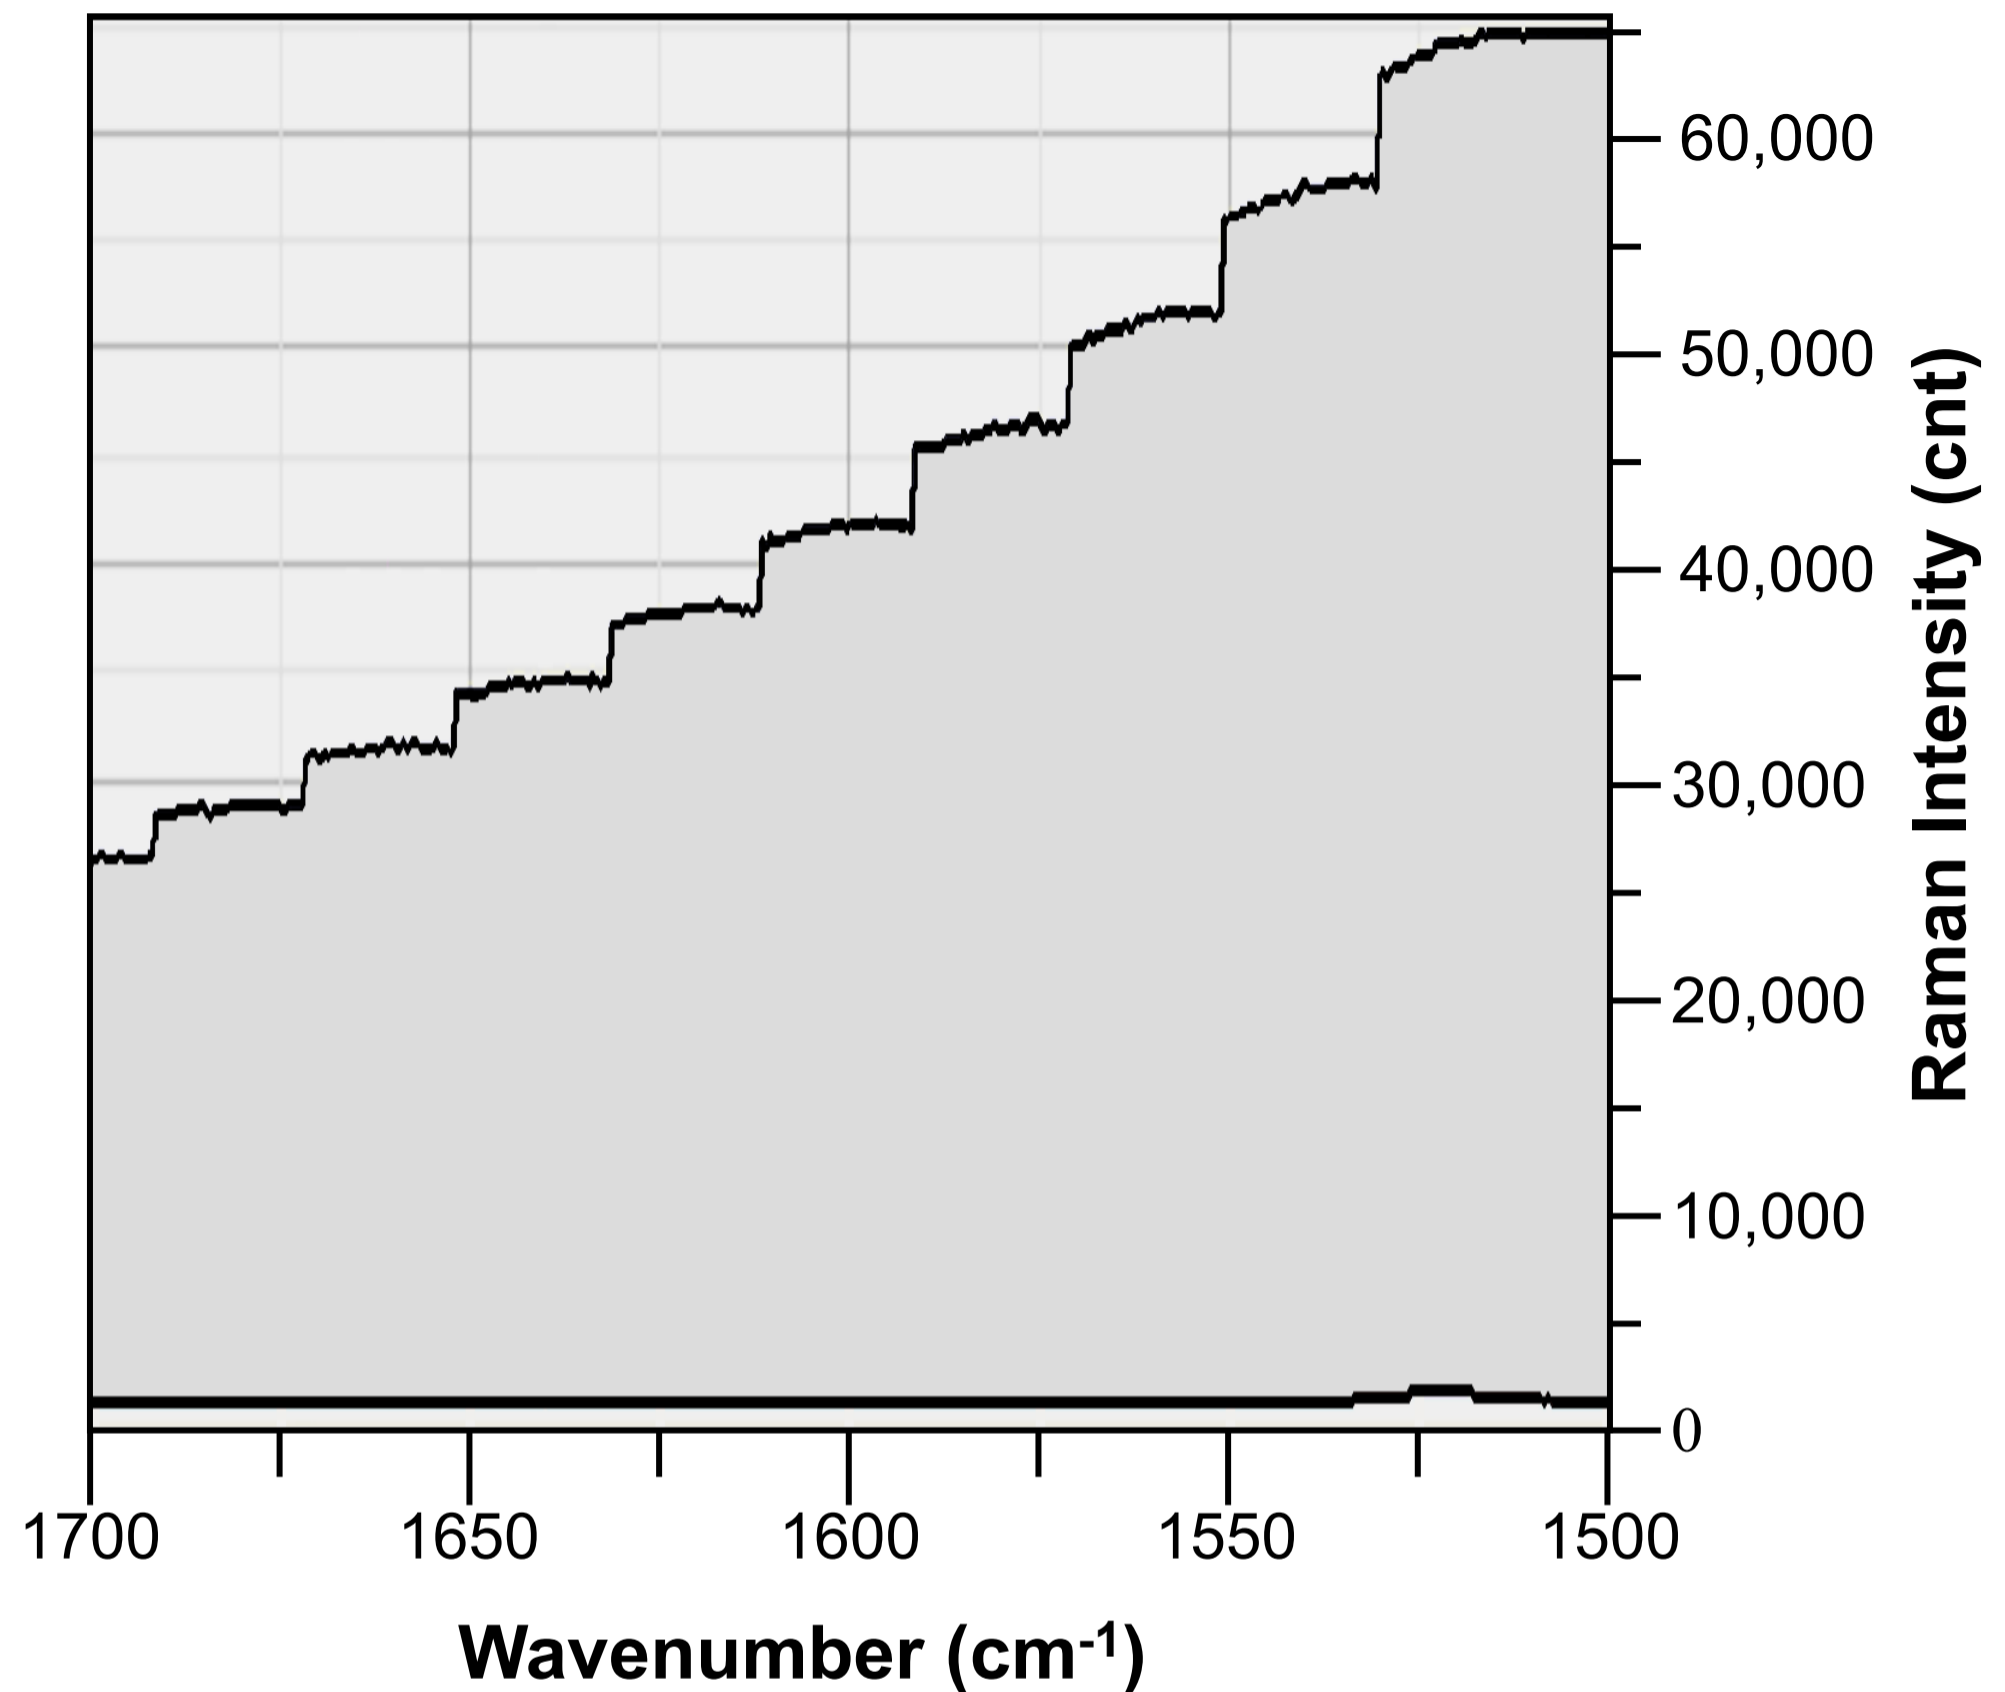

Supplemental Figure S3. ***B. braunii* autofluorescence degradation during photobleaching.** *B. braunii* colonies strongly autofluoresce using a 785 nm laser, but the magnitude quickly degrades as cells are photobleached yielding a step-like spectra as each portion of wavenumbers is collected. The first spectrum (top black line) was collected from a *B. braunii* colony at the onset of a 20 minute photobleaching treatment. Each “step” equals approximately 1 minute of data collection under photobleaching conditions. Photobleaching was considered complete when a stable baseline intensity was observed. The second spectrum (bottom black line) was collected after 20 minutes of photobleaching treatment indicating the complete loss of background autofluorescence. In this second spectra, the band at  $\sim 1520$  cm<sup>-1</sup> is from carotenoids.
